# Supplementary material for: Two-color interferometric scattering (iSCAT) microscopy reveals structural dynamics in discrete plasmonic molecules
Source: Royal Society of Chemistry journal article supplement (doi:10.1039/d4nr01288g), 2024-01-01
Supplement: d4nr01288g1.pdf [file d4nr01288g1.pdf]

# Two-color Interferometric Scattering (iSCAT) Microscopy Reveals Structural Dynamics in Discrete Plasmonic Molecules

Leslie Velasco, Aniq N. Islam, Koustav Kundu, Aidan Oi, and Björn M. Reinhard

Department of Chemistry and The Photonics Center, Boston University,  
Boston, MA 02459, United States

Email: [bmr@bu.edu](mailto:bmr@bu.edu)

**Electronic Supplementary Information**

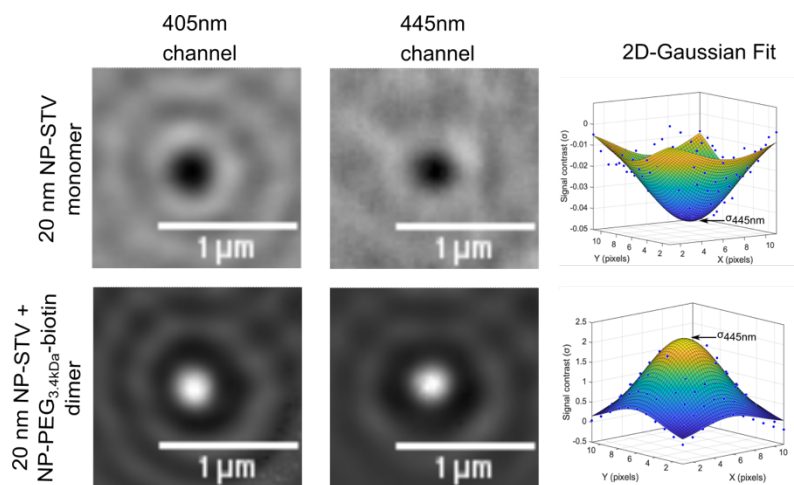

**Figure S1:** Overview of two-color iSCAT signal of 20 nm NP-STV monomer (top row) and 20 nm NP-STV + 20 nm NP-PEG<sub>3.4kDa</sub>-biotin dimer (bottom row). The last column shows two-dimensional Gaussian fits for signal on the 445 nm channel for monomer (top) and dimer (bottom) respectively.

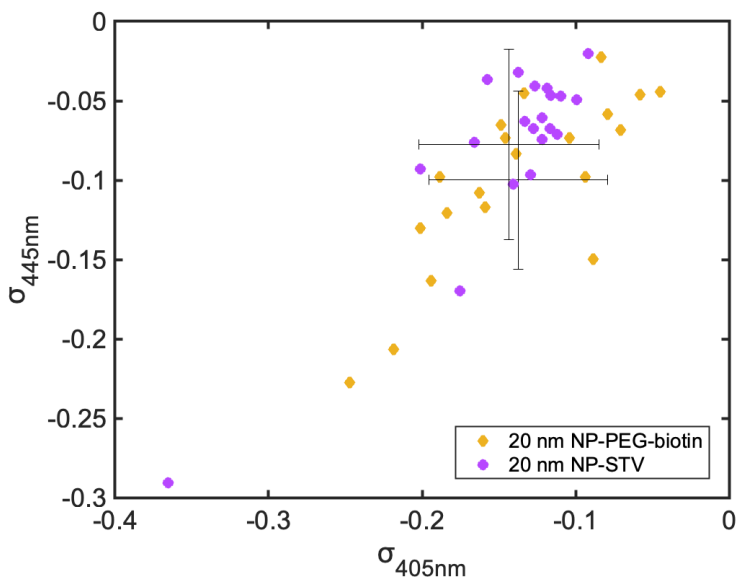

**Figure S2:**  $\sigma_{405}$ ,  $\sigma_{445}$  plots for 20 nm NP-STV and 20 nm NP-PEG<sub>3.4kDa</sub>-biotin. The averages  $\pm$  standard deviation (STD) are included. NP-STV particles were immobilized in a BSA-Biotin treated flow chamber. NP-PEG<sub>3.4kDa</sub>-biotin particles were immobilized in a BSA-Biotin and streptavidin treated flow chamber as described in methods.

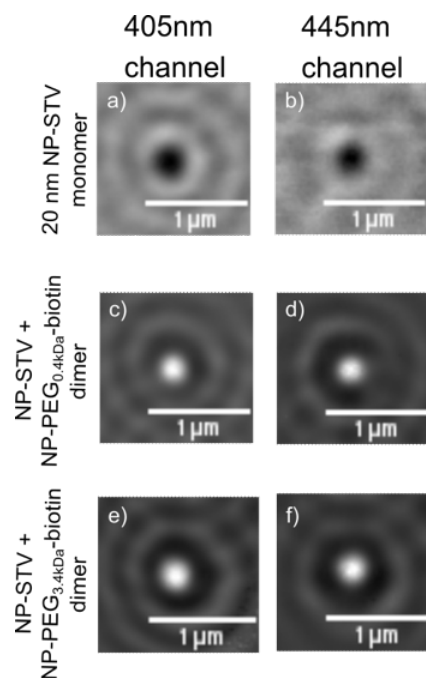

**Figure S3:** iSCAT signal of 20 nm NP-STV monomer (top row) and 20 nm NP-STV + 20 nm NP-PEG<sub>0.4kDa</sub>-biotin dimer (middle row), and 20 nm NP-STV + 20 nm NP-PEG<sub>3.4kDa</sub>-biotin dimer (bottom row).

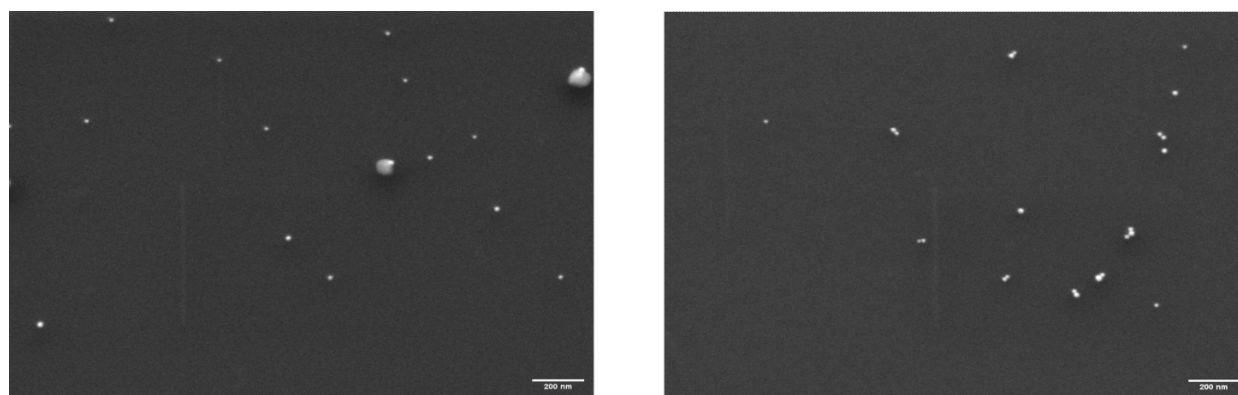

**Figure S4:** Representative SEM images at 50,000x magnification taken of 20 nm NP-STV (monomer) on left and 20 nm NP-STV + 20 nm NP-PEG<sub>3.4kDa</sub>-biotin (dimers) on right with stage tilted by 30 degrees.

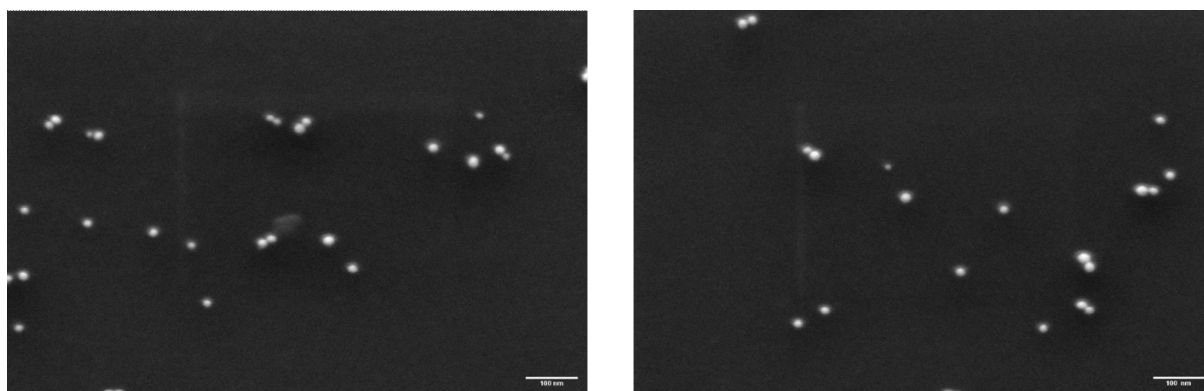

**Figure S5:** Representative SEM images at 100,000x magnification taken of 20 nm NP-STV + 20 nm NP-PEG<sub>0.4kDa</sub>-biotin (dimers) with stage tilted by 30 degrees.

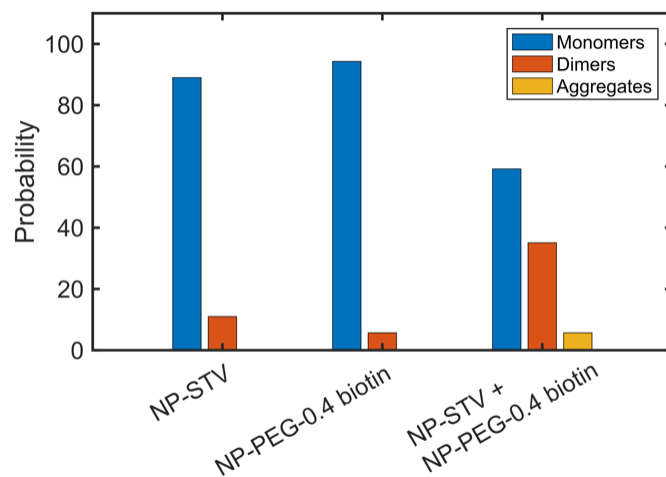

**Figure S6:** Histogram of 20 nm Ag NP aggregation state (monomers, dimers, aggregates) as determined by SEM for NP-STV, NP-PEG<sub>0.4kDa</sub>-biotin, and NP-STV + NP-PEG<sub>0.4kDa</sub>-biotin.

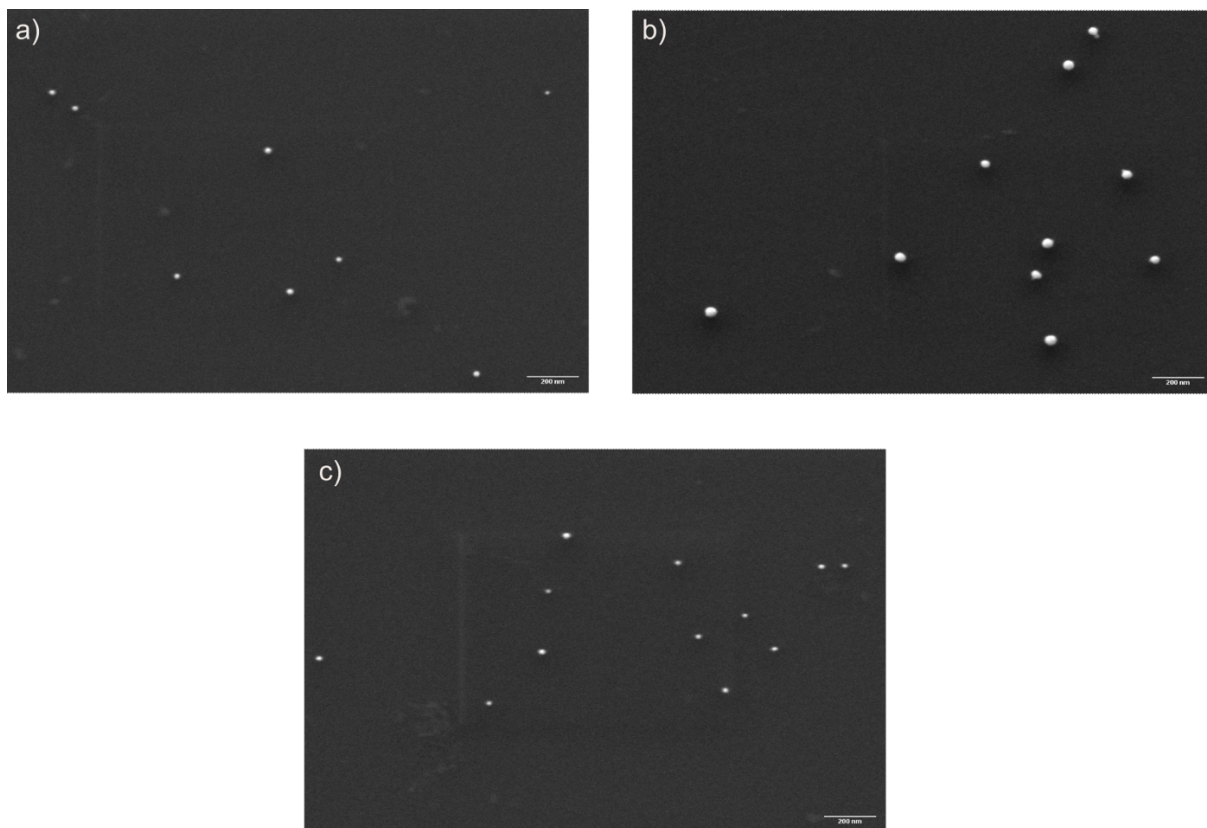

**Figure S7:** SEM images of control NP-PEG-biotin particles at 50,000x magnification. a) 20 nm NP-PEG<sub>3.4kDa</sub>-biotin monomers b) 40 nm NP-PEG<sub>3.4kDa</sub>-biotin monomers c) 20 nm NP-PEG<sub>0.4kDa</sub>-biotin monomers with stage tilted at 30 degrees.

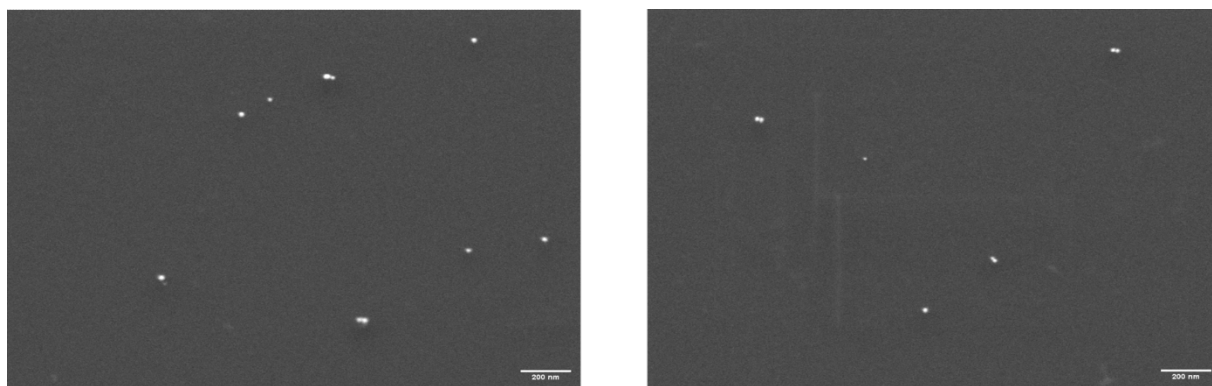

**Figure S8:** Representative SEM images at 50,000x magnification taken of 20 nm NP-STV + 40 nm NP-PEG<sub>3.4kDa</sub>-biotin heterodimers with stage titled at 30 degrees.

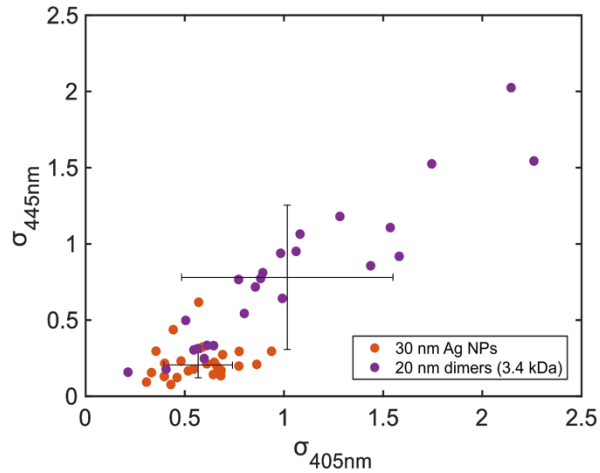

**Figure S9:**  $\sigma_{405}, \sigma_{445}$  plot for scatterers imaged after incubating 20 nm NP-STV with 20 nm NP-PEG<sub>3.4kDa</sub>-biotin (dimers) and immobilized 30 nm Ag NP monomers. The averages  $\pm$  standard deviation (STD) are included.

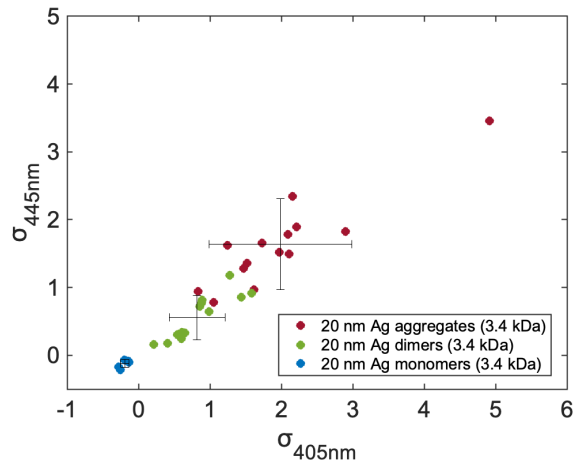

**Figure S10:**  $\sigma_{405}, \sigma_{445}$  plot for scatterers imaged after incubating 20 nm NP-STV with low (dimers) and high (aggregates) concentration of 20 nm NP-PEG<sub>3.4kDa</sub>-biotin. Low concentration of tether particles were  $10^9$  NPs/mL and high concentration  $10^{10}$  NPs/mL. The averages  $\pm$  standard deviation (STD) are included.

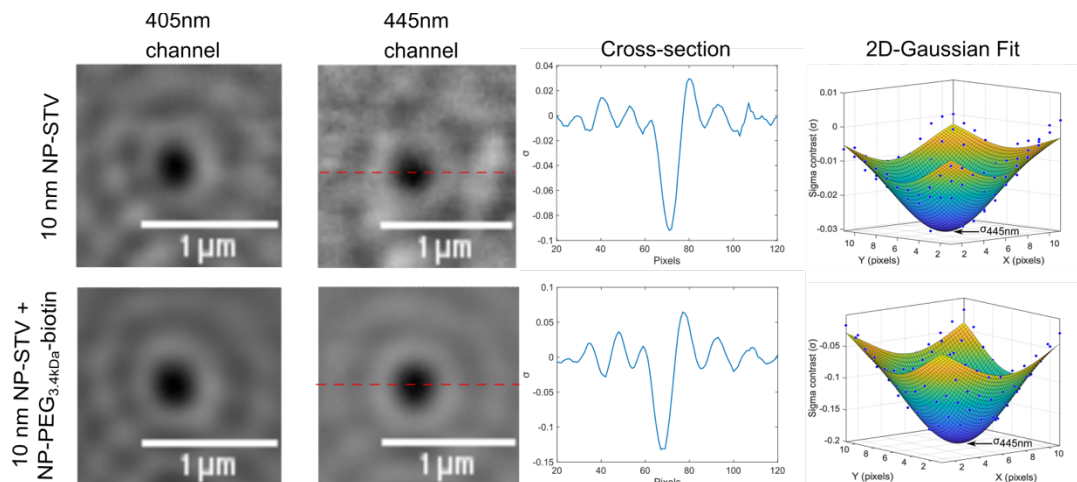

**Figure S11:** iSCAT signal of 10 nm NP-STV (top row) and 10 nm NP-STV + 10 nm NP-PEG<sub>3.4kDa</sub>-biotin (bottom row). Cross section of the signal along the red dashed line from the 445 nm channel is plotted in the third column. The last column shows two-dimensional Gaussian fits for signal on 445 nm channel for monomer (top) and dimer (bottom) respectively.

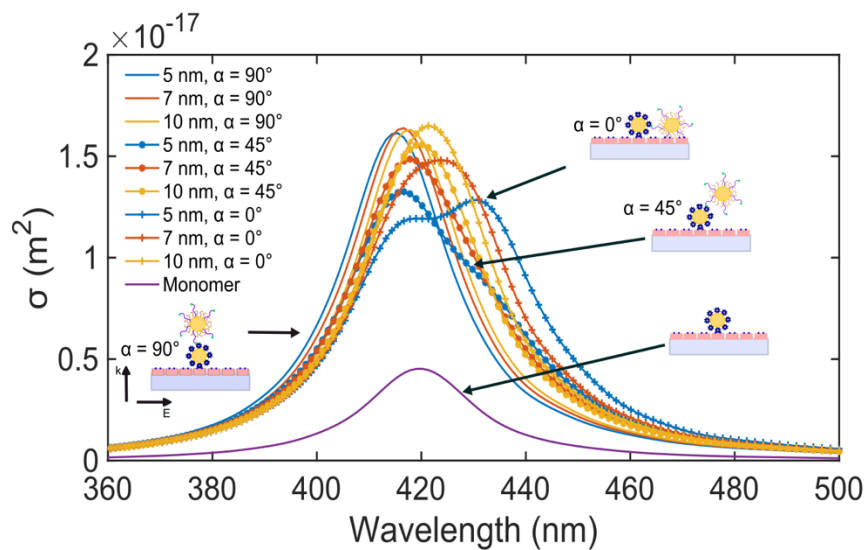

**Figure S12:** Simulated scattering spectra of 10 nm Ag NP monomer and dimers observed with circular polarized light in  $n = 1.5$  refractive index medium. For dimers three different elevations  $\alpha = 0^\circ, 45^\circ, 90^\circ$  and interparticle separations of 5 nm, 7 nm, and 10 nm were evaluated.

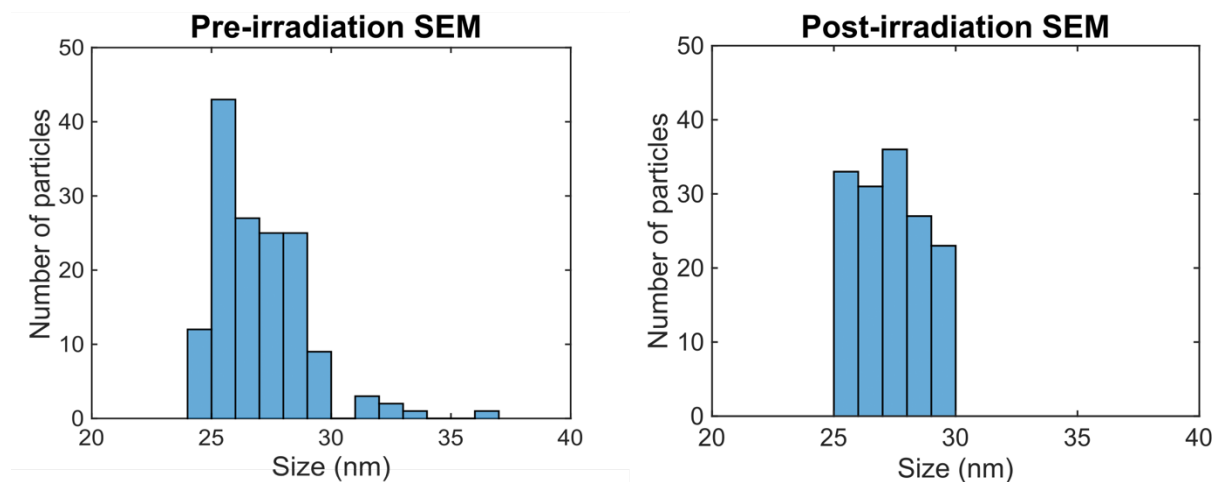

**Figure S13:** Size histograms (n=150) taken of Ag NP-PEG<sub>3.4kDa</sub>-biotin before and after illumination for 10s under identical conditions than in the iSCAT experiments. The average size of a sample of 150 particles before illumination was  $27.02 \pm 1.919$  nm. The average size of a sample of 150 particles after illumination was  $27.35 \pm 1.307$  nm.
